# Supplementary material
Source: publisher figshare collection journal article supplement (https://karger.figshare.com/ndownloader/files/13023692)
Supplement: Supplementary file 1 [file 13023692]

Supplemental Table 1. The top 20 up- and down-regulated DEGs identified between WM-BC and normal PB-BC samples

Gene symbol logFC adj.P.Value

*A: Top 20 upregulated DEGs*

IGLL1 8.26604008 1.04E-08

SEPP1 5.505910132 2.87E-05

KIF11 4.931710124 2.80E-06

GINS1 4.880668672 4.72E-07

CDKN3 4.547361741 6.67E-05

HIST1H2BD 4.096552628 7.90E-07

RAG1 3.962114609 2.39E-06

FGL2 3.954019879 5.12E-05

UBE2C 3.932657016 4.71E-05

DYNLL1 3.912787721 3.53E-12

CD9 3.845636979 1.35E-05

TNFRSF17 3.836753945 1.25E-06

KIAA0101 3.677390098 0.000167451

NREP 3.656777965 6.27E-08

DNTT 3.651908797 0.001730176

CCNB2 3.625601162 0.000389574

CD24 3.614704719 1.86E-08

SMAD1 3.569642941 1.71E-06

KIF2C 3.552016417 1.67E-05

BUB1 3.449843281 0.000165027

*B: Top 20 downregulated DEGs*

NR4A2 -6.64093355 3.09E-09

DDX3Y -5.36935689 0.002126639

LZTS3 -5.296291637 1.15E-09

TTTY15 -4.694984096 1.83E-06

G0S2 -4.639725056 0.000189216

DDIT3 -4.565925587 4.42E-09

AREG -4.427233531 2.92E-07

PPP1R15A -4.375282931 4.23E-09

OVGP1 -4.260015555 1.08E-07

RPS4Y1 -4.188592134 0.007510057

DUSP10 -4.041375811 4.66E-08

KLF4 -3.794899489 8.01E-05

ZBTB16 -3.682105442 2.13E-06

CD83 -3.676520986 2.08E-08

RARA -3.671439043 2.59E-05

MAFF -3.528293964 6.76E-09

STK17B -3.384251638 1.47E-08

ARL4A -3.353630171 2.42E-10

ADAM28 -3.343619064 0.000875134

PLEKHM2 -3.331059379 1.04E-05

Supplemental Table 2. The top 20 up- or down-regulated DEGs identified between WM-PC and normal N-PC samples

Gene symbol logFC adj.P.Value

*A: Top 20 upregulated DEGs*

SPCS2 24.49784571 0.029529387

COX6A1 22.82732571 0.030777743

SDC1 18.06998714 0.039000946

ITM2B 17.45841 0.023072079

CANX 13.93433 0.015767588

GNAS 11.68388321 0.038857523

CDK2AP2 9.871505714 0.014970042

IGLV6-57 9.36261 0.016434479

LGMN 9.228025714 0.035963299

SSR2 9.118638571 0.049756315

IGLV1-44 8.122937857 0.016084163

KDELR1 8.039857857 0.025668493

CCNI 7.536801429 0.002394883

CD38 6.973302857 0.007337801

P4HB 6.483570476 0.016084163

NCSTN 6.340874286 0.003644557

PTMS 6.193048571 0.004680287

YWHAB 6.192074286 0.000111464

CD48 5.393652857 0.00082665

PARM1 5.040207143 0.000293851

*B: Top 20 downregulated DEGs*

ATP6V0B -4.948331429 0.040509924

BTF3 -4.252598571 0.023072079

MT1B -3.701334286 0.031417689

LDHB -3.678704286 0.044907492

HNRNPA2B1 -3.614164286 0.047839956

PDGFRA -3.541073929 3.59E-05

ARHGAP4 -3.093915714 0.048704459

RNF103 -2.385674286 0.034255696

HNRNPD -2.298817143 0.049272983

ALOX5AP -2.266204286 0.023072079

ACP1 -2.193472857 0.018469856

KRT8 -2.141275714 0.025569434

ENC1 -2.105701429 0.017292082

NUDT3 -1.976404286 0.043871074

GPR56 -1.973342857 0.034901867

IGF2R -1.96242 0.005051709

CAMKK2 -1.666675714 0.00431661

SLA -1.576222857 0.023072079

PRKCB -1.495931429 0.035235898

CHD4 -1.49349 0.030777743
